# Supplementary material for: Associations of rest-activity patterns with amyloid burden, medial temporal lobe atrophy, and cognitive impairment
Source: PubMed Central journal article supplement — eBioMedicine. 2020 Jul 28;58:102881. doi: 10.1016/j.ebiom.2020.102881 (PMC7394758; doi:10.1016/j.ebiom.2020.102881), 2020-07-28
Supplement: mmc1.pdf [file mmc1.pdf]

## Supplementary Material

**Table S1.** Local effect size of midline estimation statistic of rhythm (MESOR) for dependent variables and included covariates in multiple linear regression analysis.

**Table S2.** Local effect size of least active 5-h (L5) onset time for dependent variables and included covariates in multiple linear regression analysis.

**Table S3.** Severity of white matter hyperintensities (WMHs) in study participants.

**Fig S1.** Flow diagram of study participants.

**Fig S2.** Distributions of rest-activity pattern variables.

**Table S1.** Local effect size of MESOR for dependent variables and included covariates in multiple linear regression analysis\*

| Dependent variables            | Independent variable: MESOR                                                              |                                           |                                                                                |                            |                                                                        |                            |
|--------------------------------|------------------------------------------------------------------------------------------|-------------------------------------------|--------------------------------------------------------------------------------|----------------------------|------------------------------------------------------------------------|----------------------------|
|                                | All Participants<br>(n=100)                                                              |                                           | Amyloid Negative<br>(n=54)                                                     |                            | Amyloid Positive<br>(n=46)                                             |                            |
|                                | Covariates included <sup>a</sup>                                                         | Cohen's $f^2$ for<br>MESOR <sup>†,‡</sup> | Covariates included                                                            | Cohen's $f^2$ for<br>MESOR | Covariates included                                                    | Cohen's $f^2$ for<br>MESOR |
| <b>Neuroimaging biomarkers</b> |                                                                                          |                                           |                                                                                |                            |                                                                        |                            |
| Cortical amyloid burden, SUVR  | Age, education, ACEi use, and APOE ε4 allele carrier status                              | < 0.01                                    | No covariates included                                                         | NA                         | ACEi use                                                               | < 0.01                     |
| Medial temporal lobe GM volume | Age, sex, diabetes, ACEi use, and APOE ε4 allele carrier status                          | 0.02                                      | Age, sex, diabetes                                                             | 0.01                       | Age, ACEi use, sleep medication use, and APOE ε4 allele carrier status | 0.01                       |
| <b>Cognitive function</b>      |                                                                                          |                                           |                                                                                |                            |                                                                        |                            |
| Language function              | Age, sex, education, living alone, ACEi use, and APOE ε2 allele carrier status           | 0.02                                      | Education, and APOE ε2 allele carrier status                                   | 0.03                       | Education, living alone, ACEi use, and APOE ε4 allele carrier status   | 0.01                       |
| Visuospatial function          | Education and APOE ε2 allele carrier status                                              | < 0.01                                    | Education, diabetes, and number of weekend days                                | 0.06                       | Education and ACEi use                                                 | 0.01                       |
| Memory function                | Education, ACEi use, APOE ε2 allele carrier and ε4 allele carrier status                 | < 0.01                                    | Education and APOE ε2 allele carrier status                                    | 0.01                       | Education and ACEi use                                                 | < 0.01                     |
| Frontal/executive function     | Education, living alone, ACEi use, antipsychotics use, and APOE ε2 allele carrier status | 0.08                                      | Education, living alone, antipsychotics use, and APOE ε2 allele carrier status | 0.17                       | Sex, education, living alone, and APOE ε4 allele carrier status        | 0.03                       |

ACEi, acetylcholine esterase inhibitor; APOE, apolipoprotein E; GM, grey matter; MESOR, midline estimation statistic of rhythm; SUVR, standardized uptake value ratio

\* We adjusted for age, sex, education, living alone, diabetes, hypertension, depressive symptoms, acetylcholine esterase inhibitor use, antidepressant use, antipsychotics use, benzodiazepine use, sleep medication use, number of weekend days, and apolipoprotein -ε allele carrier status using a forward stepwise method. MESOR was directly entered into the regression model.

<sup>†</sup> We measured local effect size of MESOR using a variation of Cohen's  $f^2$  according to the following equation: local effect size =  $(R^2_{MC} - R^2_C)/(1 - R^2_{MC})$ , where  $R^2_{MC}$  = proportion of variance accounted for by MESOR and covariates together,  $R^2_C$  = proportion of variance accounted for by covariates.

<sup>‡</sup> According to Cohen's guidelines,  $f^2 \geq 0.02$ ,  $f^2 \geq 0.15$ , and  $f^2 \geq 0.35$  represent small, medium, and large effect sizes, respectively.

**Table S2.** Local effect size of L5 onset time for dependent variables and included covariates in multiple linear regression analysis\*

| Dependent variables            | Independent variable: L5 onset time                                                       |                                                 |                                                        |                                 |                                                                           |                                 |
|--------------------------------|-------------------------------------------------------------------------------------------|-------------------------------------------------|--------------------------------------------------------|---------------------------------|---------------------------------------------------------------------------|---------------------------------|
|                                | All participants (n=100)                                                                  |                                                 | Amyloid-negative (n=54)                                |                                 | Amyloid-positive (n=46)                                                   |                                 |
|                                | Covariates included <sup>a</sup>                                                          | Cohen's $f^2$ for L5 onset time <sup>†, ‡</sup> | Covariates included                                    | Cohen's $f^2$ for L5 onset time | Covariates included                                                       | Cohen's $f^2$ for L5 onset time |
| <b>Neuroimaging biomarkers</b> |                                                                                           |                                                 |                                                        |                                 |                                                                           |                                 |
| Cortical amyloid burden, SUVR  | Age, education, ACEi use, and APOE $\epsilon$ 4 allele carrier status                     | 0.02                                            | No covariates included                                 | NA                              | ACEi use                                                                  | < 0.01                          |
| Medial temporal lobe GM volume | Age, sex, ACEi use, and APOE $\epsilon$ 4 allele carrier status                           | 0.04                                            | Age, sex, and diabetes                                 | 0.28                            | ACEi use                                                                  | < 0.01                          |
| <b>Cognitive function</b>      |                                                                                           |                                                 |                                                        |                                 |                                                                           |                                 |
| Language function              | Age, sex, education, ACEi use, and APOE $\epsilon$ 2 allele carrier status                | 0.03                                            | Education, and APOE $\epsilon$ 2 allele carrier status | 0.06                            | Age, education, and ACEi use                                              | 0.01                            |
| Visuospatial function          | Age, education, and ACEi use                                                              | 0.02                                            | Education, diabetes, and number of weekend days        | 0.03                            | Education and ACEi use                                                    | 0.06                            |
| Memory function                | Education, ACEi use, and APOE $\epsilon$ 2 allele and $\epsilon$ 4 allele carrier status  | 0.02                                            | Education, and APOE $\epsilon$ 2 allele carrier status | 0.19                            | Education and ACEi use                                                    | < 0.01                          |
| Frontal/executive function     | Age, education, ACEi use, antipsychotics use, and APOE $\epsilon$ 2 allele carrier status | 0.07                                            | APOE $\epsilon$ 2 allele carrier status                | 0.09                            | Sex, education, living alone, and APOE $\epsilon$ 4 allele carrier status | 0.15                            |

ACEi, acetylcholine esterase inhibitor; APOE, apolipoprotein E; GM, grey matter; L5 onset time, least active 5-h onset time; SUVR, standardized uptake value ratio

\* We adjusted for age, sex, education, living alone, diabetes, hypertension, depressive symptom, acetylcholine esterase inhibitor use, antidepressant use, antipsychotics use, benzodiazepine use, sleep medication use, number of weekend days, and apolipoprotein  $\epsilon$  allele carrier status using a forward stepwise method. L5 onset time was directly entered into the regression model.

<sup>†</sup> We measured the local effect size of L5 onset time using a variation of Cohen's  $f^2$  according to the following equation: local effect size =  $(R^2_{LC} - R^2_C)/(1 - R^2_{LC})$ , where  $R^2_{LC}$  = proportion of variance accounted for by L5 onset time and covariates together,  $R^2_C$  = proportion of variance accounted for by covariates.

<sup>‡</sup> According to Cohen's guidelines,  $f^2 \geq 0.02$ ,  $f^2 \geq 0.15$ , and  $f^2 \geq 0.35$  represent small, medium, and large effect sizes, respectively.

**Table S3.** Severity of white matter hyperintensities (WMHs) in study participants.

|                      | Amyloid-Negative |      | Amyloid-Positive |      |
|----------------------|------------------|------|------------------|------|
|                      | N                | %    | N                | %    |
| <b>WMHs severity</b> |                  |      |                  |      |
| - Mild severity      | 35               | 64.8 | 30               | 65.2 |
| - Moderate severity  | 14               | 25.9 | 11               | 23.9 |
| - Severe severity    | 5                | 9.3  | 5                | 10.9 |

*P*-value for chi-square test = 0.949

**Fig S1.** Flow diagram of study participants.

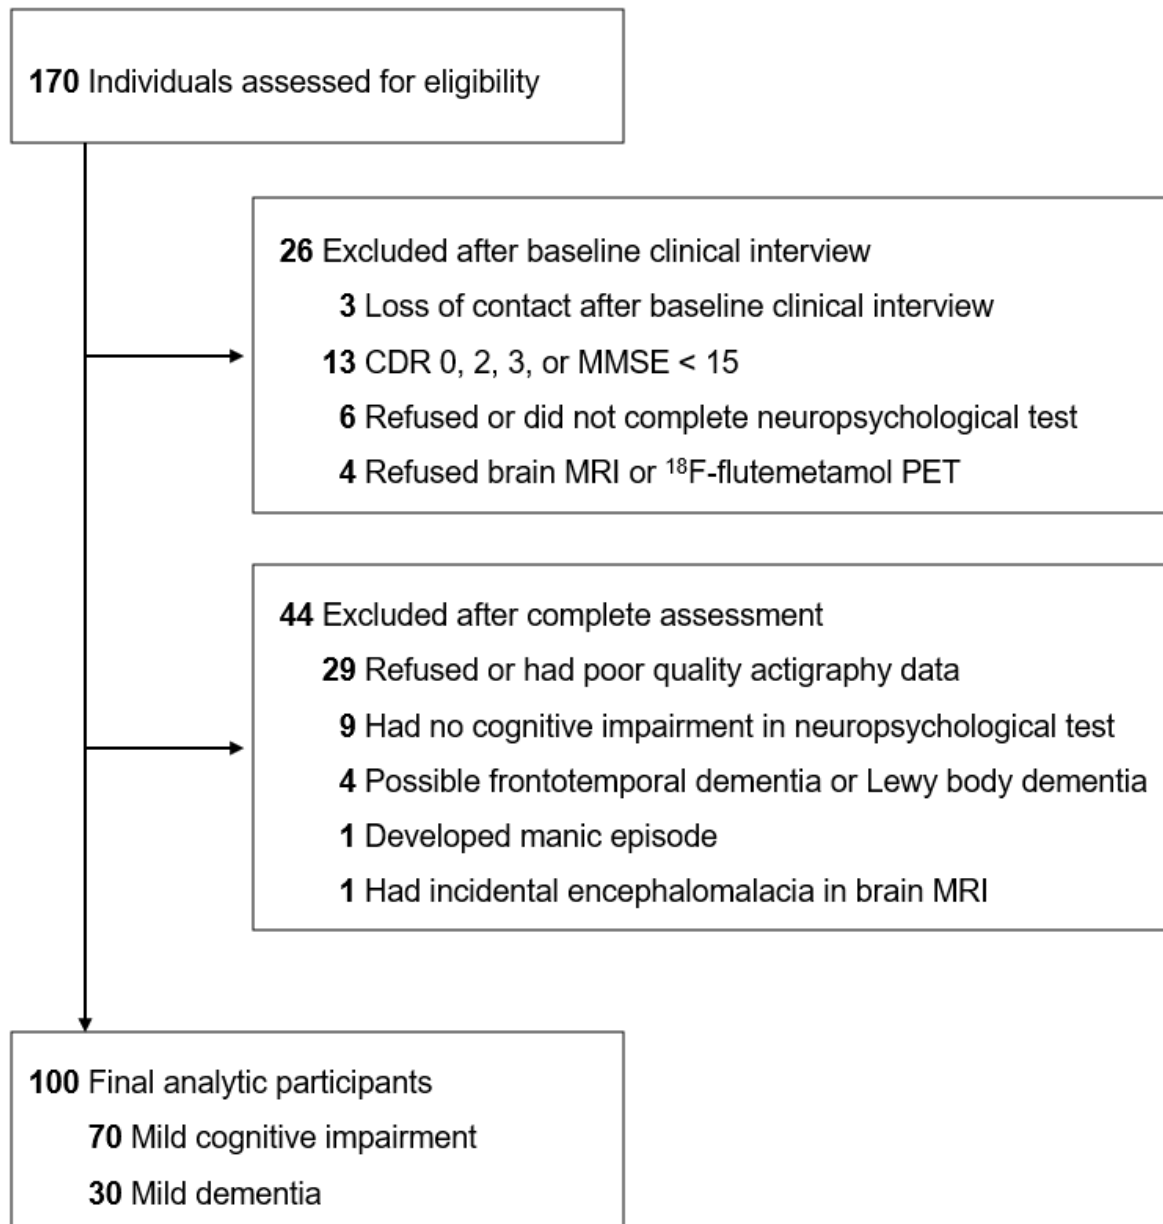

CDR, Clinical Dementia Rating; MMSE, Mini-Mental Status Examination; MRI, magnetic resonance imaging; PET, positron emission tomography

**Fig S2.** Distributions of rest-activity pattern variables.

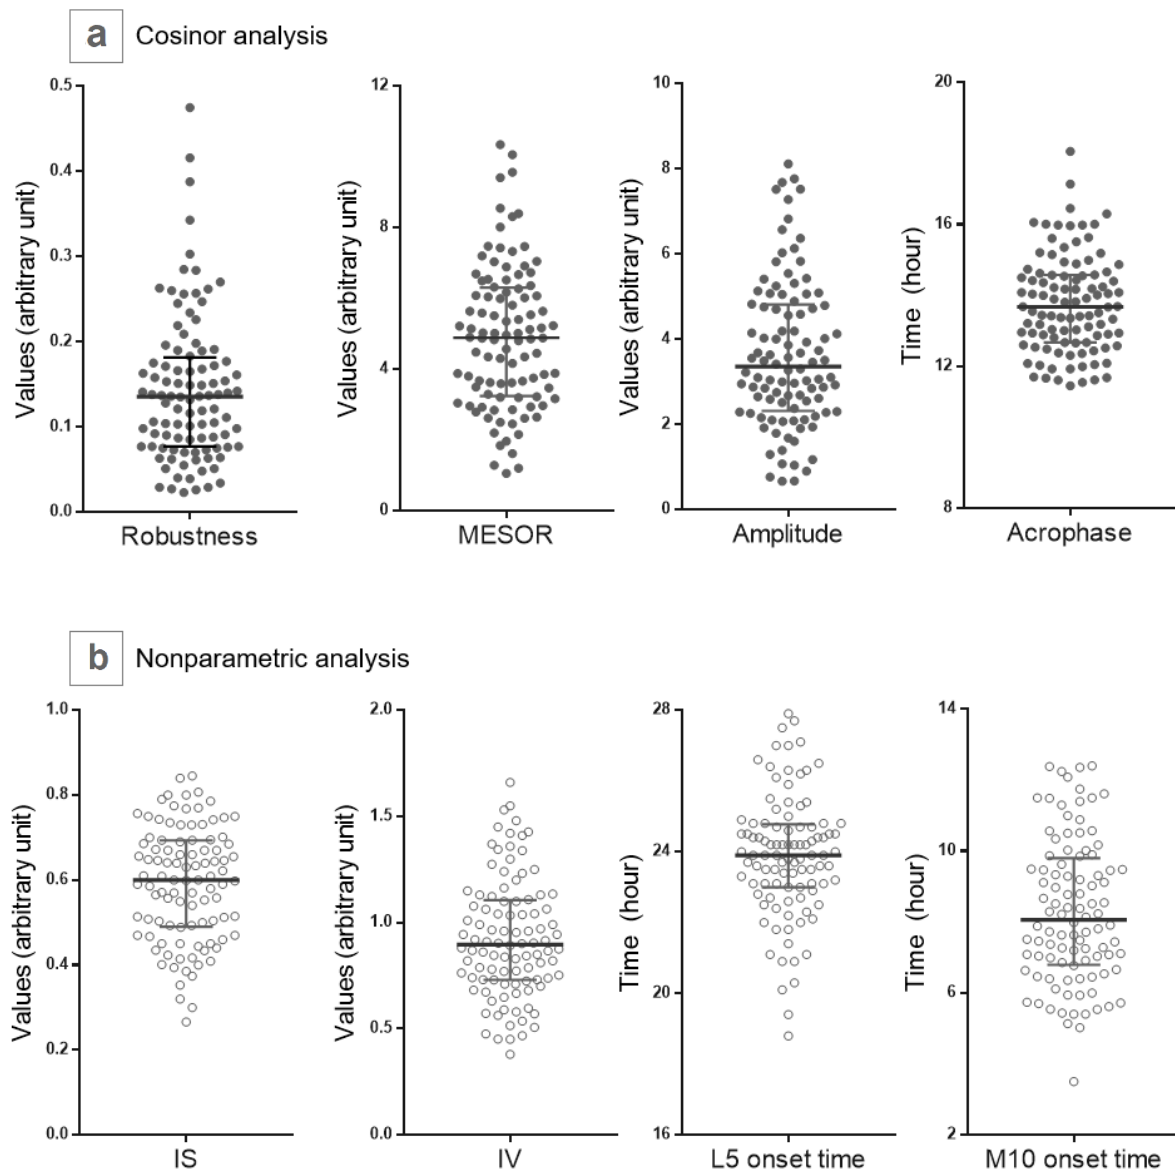

Rest-activity pattern variables are expressed as arbitrary units, except for the three phase-associated variables (acrophase, L5 onset time, and M10 onset time). Circles indicate patients. Bars in the middle indicate medians, while error bars indicate Interquartile range. IS, inter-daily stability; IV, intra-daily variability; L5 onset time, least active 5-h onset time; M10 onset time, most active 10-h onset time; MESOR, midline estimation statistic of rhythm
